# Supplementary material for: Role of GOLPH3 and TPX2 in Neuroblastoma DNA Damage Response and Cell Resistance to Chemotherapy
Source: MDPI journal article supplement (doi:10.3390/ijms20194764), 2019-09-25
Supplement: s1 [file s1]

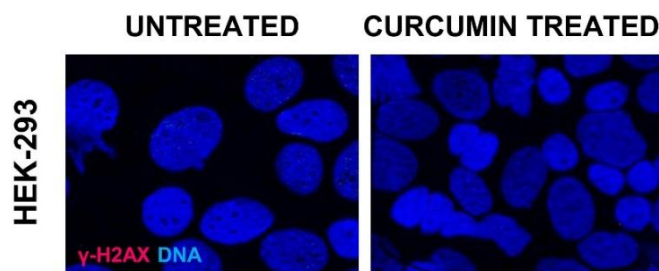

**Supplementary Figure 1.** Immunofluorescence analysis of non tumoral control HEK-293 cells cultured with 20  $\mu$ M curcumin 48 hours using anti- $\gamma$ H2AX (red). Cells were counterstained with DAPI to visualize nuclei (blue). Untreated cells were cultured with 0.1% DMSO. (Magnification 40x).

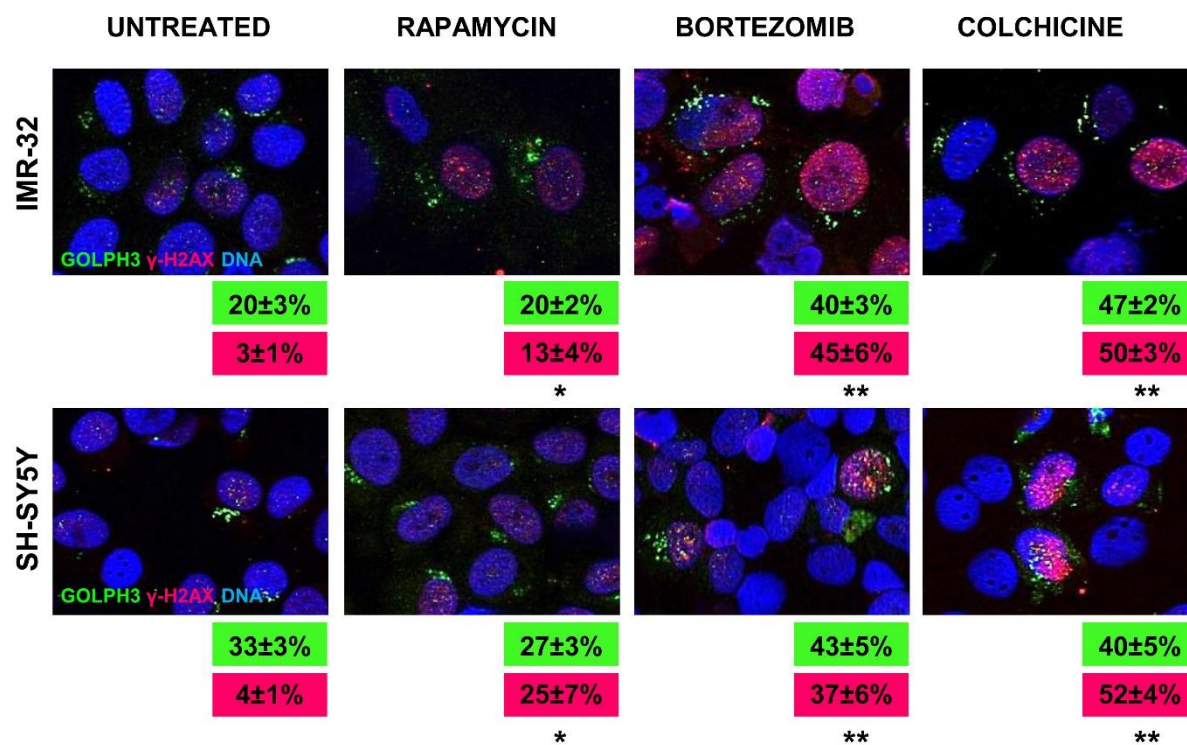

**Supplementary Figure 2.** Immunofluorescence analysis of IMR-32 and SH-SY5Y cells cultured respectively with 300 nM or 500 nM Rapamycin, with 2 nM or 3.5 nM Bortezomib and with 0.02  $\mu$ M or 0.05  $\mu$ M Colchicine for 48 hours using anti-GOLPH3 (green) and anti- $\gamma$ H2AX (red) and compared to untreated cells. Cells were counterstained with DAPI to visualize nuclei (blue). (Magnification 40x). In green and red boxes are reported the percentages of GOLPH3 and  $\gamma$ H2AX positive cells respectively. Data are representative of three independent experiments  $\pm$  S.D.
